# Supplementary material
Source: ML conference proceedings conference paper supplement (https://aclanthology.org/D18-1449)
Supplement: Attachment [file D18-1449.Attachment.pdf]

# Supplementary Materials of Frustratingly Easy Model Ensemble for Abstractive Summarization

Hayato Kobayashi

Yahoo Japan Corporation / RIKEN AIP  
hakobaya@yahoo-corp.jp

## A Proof of Theorem 1

*Proof.* First, we will prove the following equation.

$$\tilde{p}(y) = \max_{s \in S} \tilde{p}(s), \quad (1)$$

where  $S$  and  $y$  are the output candidates and the selected output, respectively, in Algorithm 1 with  $K(s, s') = \cos(s, s')$ , and  $\tilde{p}$  is the first order Taylor series approximation of the kernel density estimator  $p$  based on the von Mises-Fisher kernel.

From the definition of the von Mises-Fisher kernel, we have

$$p(s) = \frac{1}{|S|} \sum_{s' \in S} K_{\text{vmf}}(s, s') \quad (2)$$

$$= \frac{1}{|S|} \sum_{s' \in S} C_q(\kappa) \exp(\kappa \cos(s, s')) \quad (3)$$

$$\propto \sum_{s' \in S} \exp(\kappa \cos(s, s')), \quad (4)$$

where  $C_q(\kappa)$  and  $\kappa$  are the normalization constant and concentration parameter of the von Mises-Fisher kernel. Using the first order Taylor series approximation at 0 of  $\exp(x)$ , i.e.,  $\exp(x) \approx 1+x$ , we have  $\tilde{p}(s) \propto \sum_{s' \in S} (1 + \kappa \cos(s, s'))$ . Therefore, the definition of  $y$  yields

$$y = \frac{1}{|S|} \operatorname{argmax}_{s \in S} \sum_{s' \in S} \cos(s, s') \quad (5)$$

$$= \operatorname{argmax}_{s \in S} \sum_{s' \in S} 1 + \kappa \cos(s, s') \quad (6)$$

$$= \operatorname{argmax}_{s \in S} \tilde{p}(s). \quad (7)$$

This proves Eq. (1).

Next, we consider the following equation.

$$p(y^*) - p(y) \leq C_q(\kappa) \kappa^2 \exp(\kappa) (\sigma^2 + \mu^2), \quad (8)$$

where  $y^*$  is the ideal output that maximizes the von Mises-Fisher kernel, i.e.,  $y^* = \operatorname{argmax}_{s \in S} p(s)$ , and  $\mu$  and  $\sigma^2$  are the maximum values of the mean and variance of the cosine similarities  $\cos(s, s')$  with respect to an output candi-

date  $s$ , defined as

$$\mu = \max_{s \in S} \mathbb{E}_{s'} [\cos(s, s')] \quad (9)$$

$$\sigma^2 = \max_{s \in S} \mathbb{V}_{s'} [\cos(s, s')]. \quad (10)$$

The Lagrange error bound  $R_n(x)$  of the  $n$ -th Taylor series approximation of  $f(x)$  is defined as

$$R_n(x) = \frac{\max_{x'} f^{(n+1)}(x')}{(n+1)!} x^{n+1}. \quad (11)$$

In our case, the error bound  $\tilde{R}(x)$  is calculated for the first order approximation of  $\exp(x)$ , where  $x = \kappa \cos(s, s')$ , and  $-\kappa \leq x \leq \kappa$ , and thus, we obtain the upper bound as

$$\tilde{R}(x) = \frac{\max_{x'} \exp(x')}{2!} x^2 \quad (12)$$

$$\leq \frac{\exp(\kappa)}{2} x^2. \quad (13)$$

Here, we define the approximation error between  $p(s)$  and  $\tilde{p}(s)$  with respect to an output  $s$  as  $R'(s)$ . This error can be bounded as follows.

$$R'(s) = |p(s) - \tilde{p}(s)| \quad (14)$$

$$\leq \frac{1}{|S|} \sum_{s' \in S} C_q(\kappa) \tilde{R}(\kappa \cos(s, s')) \quad (15)$$

$$\leq \frac{1}{|S|} \sum_{s' \in S} C_q(\kappa) \frac{\exp(\kappa)}{2} (\kappa \cos(s, s'))^2 \quad (16)$$

$$= C_q(\kappa) \frac{\kappa^2 \exp(\kappa)}{2} \frac{1}{|S|} \sum_{s' \in S} \cos^2(s, s') \quad (17)$$

$$= C_q(\kappa) \frac{\kappa^2 \exp(\kappa)}{2} (\sigma_s^2 + \mu_s^2), \quad (18)$$

where  $\mu_s = \frac{1}{|S|} \sum_{s' \in S} \cos(s, s')$ , and  $\sigma_s^2 = \frac{1}{|S|} \sum_{s' \in S} \cos^2(s, s') - \mu_s^2$ .

From the approximation error of  $\tilde{p}(y^*)$ , we obtain the following.

$$p(y^*) - R'(y^*) \leq \tilde{p}(y^*) \quad (19)$$

Similarly, from the approximation error of  $\tilde{p}(y)$ , we obtain the following.

$$\tilde{p}(y) \leq p(y) + R'(y) \quad (20)$$

Using the optimality of  $y$  with respect to  $\tilde{p}$ , i.e.,  $\tilde{p}(y^*) \leq \tilde{p}(y)$ , we can connect the above two inequalities as

$$p(y^*) - p(y) \leq R'(y^*) + R'(y) \quad (21)$$

$$\leq 2 \max_{s \in S} R'(s) \quad (22)$$

$$= C_q(\kappa) \kappa^2 \exp(\kappa) \max_{s \in S} (\sigma_s^2 + \mu_s^2). \quad (23)$$

This concludes the theorem.  $\square$
